# Supplementary material for: Synthesis of battery-grade FePO4·2H2O using high-pressure hydrolyzed precipitates of cobalt–iron alloy acid solution
Source: Royal Society of Chemistry journal article supplement (doi:10.1039/d4cc04381b), 2024-01-01
Supplement: d4cc04381b1.pdf [file d4cc04381b1.pdf]

## Supplementary Information

### Experimental details:

Typically, 2 g high-pressure hydrolyzed precipitates of cobalt-iron ally acid solution were dispersed in deionized water, and the high-pressure hydrolyzed precipitates were dissolved using dilute phosphoric acid solution at an elevated temperature. After the complete dissolution of high-pressure hydrolyzed precipitates, the mixed solution was cooled to room temperature. After that, some reduced iron powders were added into the mixed solution to consume the excess phosphoric acid, and then the pH value of the mixed solution was adjusted to 2.57 and a lot of white precipitates occurred. The mixture was elevated to 85 °C for 30 min, and then the precipitates were washed by dilute nitric acid and deionized water and centrifuged at 4000 rpm using a centrifugal machine. The obtained products were dried at 60 °C for 24 h, and then the composition and structure of synthesized battery grade  $\text{FePO}_4$  were characterized by X-ray diffraction (XRD), scanning electron microscope (SEM), transmission electron microscopy (TEM), X-ray photoelectron spectroscopy (XPS), thermogravimetric curve analysis (TGA) and X-ray fluorescence spectrometer (XRF).

### Figures:

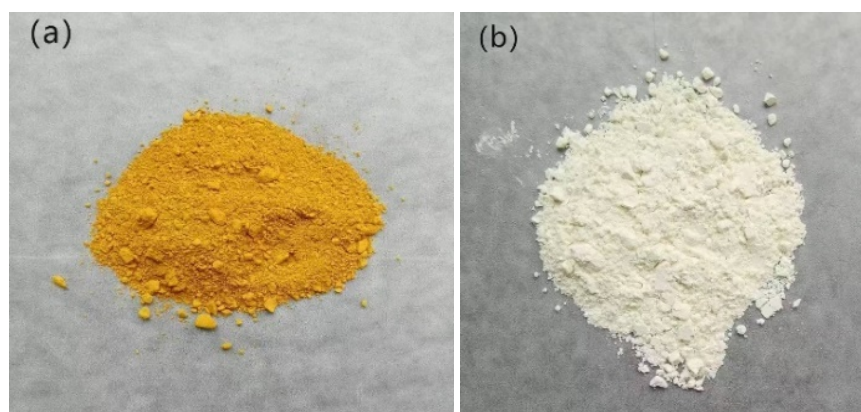

Fig. 1 Optical photograph of the high-pressure hydrolyzed precipitates (a), and the synthesized  $\text{FePO}_4 \cdot 2\text{H}_2\text{O}$  samples (b).

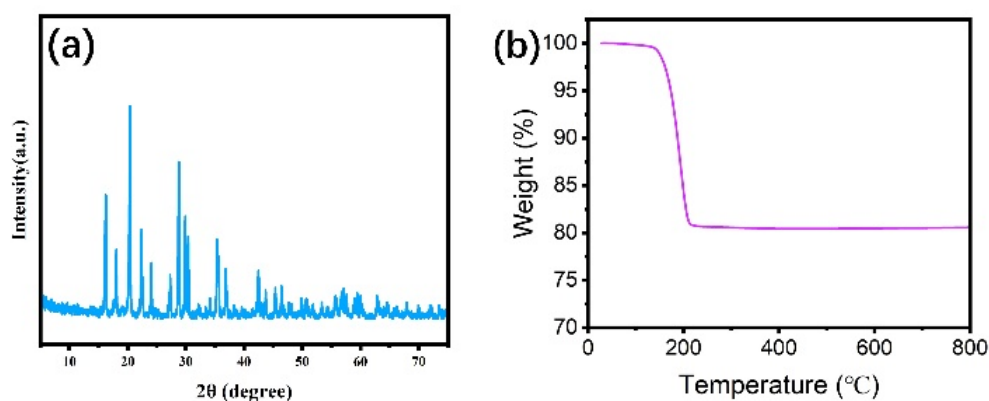

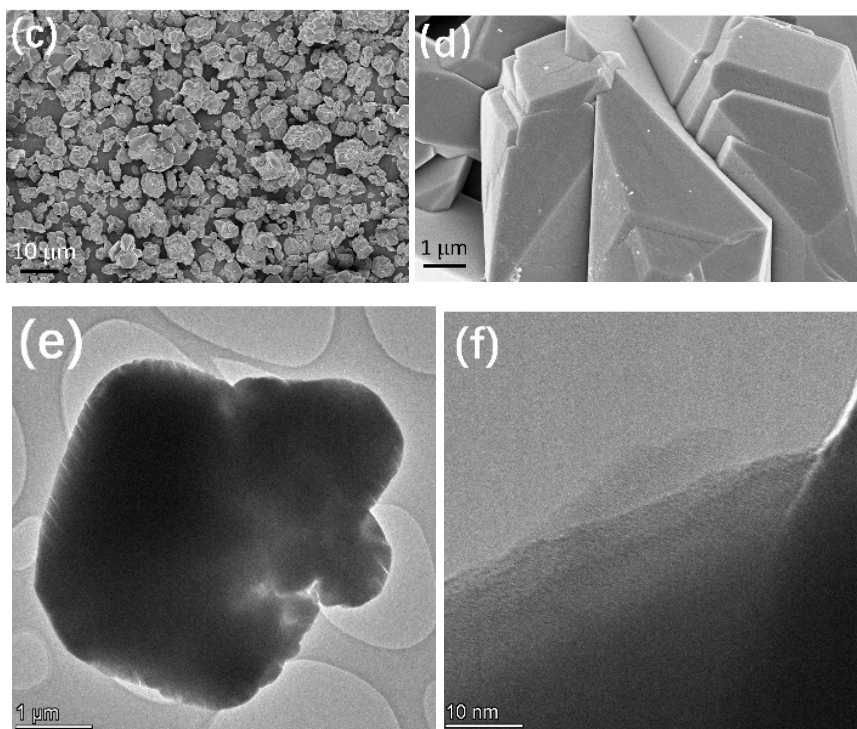

Fig. 2 XRD (a), TGA (b), SEM (c, d) and TEM (e, f) images of the synthesized battery grade  $\text{FePO}_4 \cdot 2\text{H}_2\text{O}$  samples.

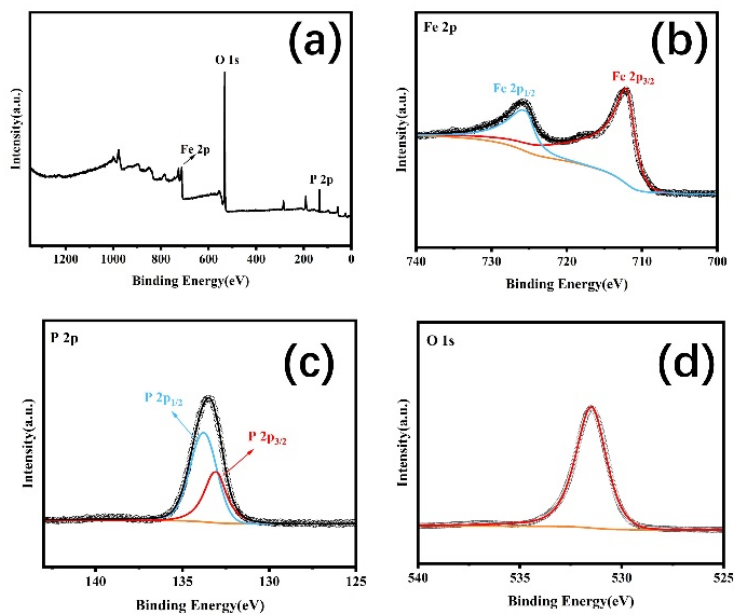

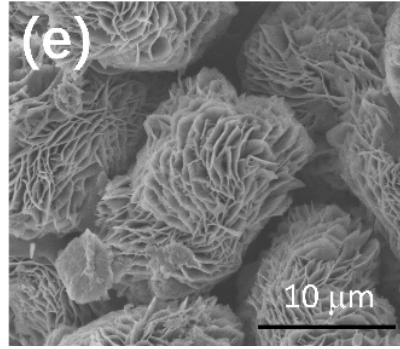

Fig. 3 XPS of the synthesized battery grade  $\text{FePO}_4 \cdot 2\text{H}_2\text{O}$  samples (a),  $\text{Fe}_2\text{p}$  (b),  $\text{P}2\text{p}$  (c),  $\text{O}1\text{s}$  (d) and the SEM of the prepared  $\text{FePO}_4 \cdot 2\text{H}_2\text{O}$  samples in the absence of  $85^\circ\text{C}$  heat treatment (e).

### Tables:

Table 1 XRF analysis of high-pressure hydrolyzed precipitates

|       |                         |                |                |                |                        |                         |                         |
|-------|-------------------------|----------------|----------------|----------------|------------------------|-------------------------|-------------------------|
| Comp. | $\text{Al}_2\text{O}_3$ | $\text{SiO}_2$ | $\text{SO}_3$  | $\text{CaO}$   | $\text{V}_2\text{O}_5$ | $\text{Cr}_2\text{O}_3$ | $\text{Fe}_2\text{O}_3$ |
| Conc. | 785.6                   | 387.0          | 6.457          | 0.118          | 54.9                   | 0.127                   | 85.957                  |
| Unit  | ppm                     | ppm            | %              | %              | ppm                    | %                       | %                       |
| Comp. | $\text{NiO}$            | $\text{ZnO}$   | $\text{ZrO}_2$ | $\text{MoO}_3$ | $\text{Ag}_2\text{O}$  | $\text{SnO}_2$          | $\text{Bi}_2\text{O}_3$ |
| Conc. | 0.119                   | 403.2          | 224.8          | 9.3            | 0.140                  | 78.7                    | 425.0                   |
| Unit  | %                       | ppm            | ppm            | ppm            | %                      | ppm                     | ppm                     |

Table 2 ICP analysis of synthesized battery-grade  $\text{FePO}_4 \cdot 2\text{H}_2\text{O}$

|         |       |       |    |        |       |        |       |
|---------|-------|-------|----|--------|-------|--------|-------|
| Element | Al    | Ca    | Co | Cr     | Cu    | Fe     | K     |
| Conc.   | 0.005 | 0.007 | —  | 0.003  | —     | 31.909 | —     |
| Unit    | %     | %     |    | %      |       | %      |       |
| Element | Mg    | Mn    | Na | P      | Pb    | Ti     | Zn    |
| Conc.   | —     | —     | —  | 17.146 | 0.003 | 0.022  | 0.002 |
| Unit    |       |       |    | %      | %     | %      | %     |

Table 3 ICP analysis of prepared  $\text{FePO}_4 \cdot 2\text{H}_2\text{O}$  without acid washing

|         |       |       |    |        |       |        |    |
|---------|-------|-------|----|--------|-------|--------|----|
| Element | Al    | Ca    | Co | Cr     | Cu    | Fe     | K  |
| Conc.   | 0.007 | 0.006 | —  | 0.003  | —     | 30.477 | —  |
| Unit    | %     | %     |    | %      |       | %      |    |
| Element | Mg    | Mn    | Na | P      | Pb    | Ti     | Zn |
| Conc.   | —     | —     | —  | 18.192 | 0.003 | 0.031  | —  |
| Unit    |       |       |    | %      | %     | %      |    |
